# Supplementary material for: Simultaneous and site-specific profiling of heterogeneity and turnover in protein S-acylation by intact S-acylated peptide analysis with a cleavable bioorthogonal tag
Source: Royal Society of Chemistry journal article supplement (doi:10.1039/d3an02059b), 2023-12-20
Supplement: d3an02059b2.xlsx [file d3an02059b2.xlsx]

## Sheet: Sheet1
Supporting Table 1: Site-specific quantitative information of 17-ODYA-labelled sites of multi-palmitoylated proteins in pulse-chase experiments. Ion mobility MS data were analyzed with Maxquant. 17-ODYA (C) (+405.335530 Da, 17-ODYA plus a remaining fragment-143 Da), nethylmaleimide (C) (+125.047679 Da) and oxidation (M) (+15.994915 Da) were set as varibale modifications, minimal score was set as …
Proteins	Positions within proteins	Localization probability	Score difference	PEP（posterior error probability）	Score	Quantitative information in different chase time
						0 h	1 h	2 h	4 h	6 h	8 h
sp|O00571|DDX3X_HUMAN;sp|O15523|DDX3Y_HUMAN	298;296	1	61.2264	0.000171254	61.226
sp|O00571|DDX3X_HUMAN;sp|O15523|DDX3Y_HUMAN;sp|Q9NQI0|DDX4_HUMAN	223;221;331	1	40.5891	0.0411494	40.589
sp|O15403|MOT7_HUMAN	9	1	75.294	2.76016e-36	132.32	813558	350246
sp|P32970|CD70_HUMAN	17	1	43.5122	6.90572e-55	142.36	970934	631674	58774.5	127496		150140
sp|O14936|CSKP_HUMAN	684	1	45.0814	0.0451112	45.081
sp|P01112|RASH_HUMAN	184	0.999773	36.4395	8.43686e-93	157.75	1.17581e+06	1.39736e+06	379992	684654
sp|Q9C0B5|ZDHC5_HUMAN	237	0.968976	14.9461	1.01273e-11	105.67	90241.5	223308	33250.3	122910
sp|P49207|RL34_HUMAN	49	0.999999	60.6168	3.25814e-05	91.906	157856	61794.9		26872.9
sp|P14618|KPYM_HUMAN	358	1	50.4978	2.73442e-51	127.28	54685.1	193650
sp|O60716|CTND1_HUMAN	618	1	45.9717	0	242.67	2.31675e+07	1.17732e+07	473833	2.66284e+06	712736	661224
sp|O75882|ATRN_HUMAN	1361	1	47.2013	0.00414908	47.201
sp|O75882|ATRN_HUMAN	1307	1	73.985	0.00105832	73.985
sp|O15403|MOT7_HUMAN	479	1	85.8373	0.000117416	85.837	109011
sp|O75955|FLOT1_HUMAN	34	1	91.8577	2.46426e-35	131.06	107910	130142	330464		1.52736e+06	755678
sp|P60033|CD81_HUMAN	6	1	51.8544	0.00442041	79.116	129774
sp|O94854|K0754_HUMAN	17	1	73.2482	1.51306e-38	116.94	590760	291084
sp|O95807|TM50A_HUMAN	13	0.999142	30.6596	0.0012193	61.344		15879
sp|Q04941|PLP2_HUMAN	16	0.998652	28.6981	4.74582e-05	70.281						152980
sp|O95857|TSN13_HUMAN;sp|Q12999|TSN31_HUMAN	3;3	0.999968	44.9945	0.0144216	45.081
sp|O95857|TSN13_HUMAN;sp|Q12999|TSN31_HUMAN	8;8	1	80.8518	9.27363e-06	86.011	49498.2	33292
sp|P62937|PPIA_HUMAN;sp|Q9Y536|PAL4A_HUMAN;sp|P0DN26|PAL4F_HUMAN;sp|F5H284|PAL4D_HUMAN;sp|A0A0B4J2A2|PAL4C_HUMAN;sp|A0A075B767|PAL4H_HUMAN;sp|A0A075B759|PAL4E_HUMAN	62;62;62;62;62;62;62	1	40.0246	3.04789e-07	80.609	105313	75404.5	25561.5
sp|P00338|LDHA_HUMAN;sp|Q6ZMR3|LDH6A_HUMAN;sp|P07864|LDHC_HUMAN;sp|P07195|LDHB_HUMAN	163;163;163;164	1	41.2833	1.53324e-60	144.68	459682	607037	101343	303074	36258.7	61068.7
sp|Q8IZN3|ZDH14_HUMAN;sp|Q9Y397|ZDHC9_HUMAN	195;169	1	81.8123	1.30134e-09	107.14	157575
sp|Q6NUT3|MFS12_HUMAN	87	0.946264	12.4575	9.11601e-05	87.639	709908	721268	272726	285235
sp|O95807|TM50A_HUMAN	87	1	65.4716	7.97739e-15	115.34	433860	301090	43652.2	240668	41014	28152
sp|P01112|RASH_HUMAN	181	0.998196	27.4305	4.70928e-11	98.281	1.16849e+06	682119	82335	115714	49090.1
sp|P00558|PGK1_HUMAN	316	1	50.0294	4.82859e-44	120.85	405041	240275	97530.4	67818.2
sp|P04075|ALDOA_HUMAN	135	1	59.6613	6.81577e-09	59.661
sp|Q5W111|SPRY7_HUMAN	150	1	42.3359	0.00119389	67.456	95061.4	129816
sp|P04406|G3P_HUMAN	152	0.998715	28.907	0.0104141	42.382
sp|P04406|G3P_HUMAN	156	0.999467	32.7344	5.25057e-07	71.558
sp|P04899|GNAI2_HUMAN	140	1	74.4602	5.69451e-06	99.215	29012.5	16235.2
sp|Q587I9|SFT2C_HUMAN	132	1	51.6879	0.00496735	67.169			85912
sp|P07437|TBB5_HUMAN;sp|P68371|TBB4B_HUMAN;sp|P04350|TBB4A_HUMAN;sp|A6NNZ2|TBB8B_HUMAN;sp|Q9BVA1|TBB2B_HUMAN;sp|Q13885|TBB2A_HUMAN;sp|Q3ZCM7|TBB8_HUMAN	354;354;354;354;354;354;354	1	45.6801	2.86524e-05	86.011	120704	47698.7	26710.5
sp|P07437|TBB5_HUMAN;sp|P68371|TBB4B_HUMAN;sp|P04350|TBB4A_HUMAN;sp|Q13509|TBB3_HUMAN;sp|A6NNZ2|TBB8B_HUMAN;sp|Q9BVA1|TBB2B_HUMAN;sp|Q13885|TBB2A_HUMAN;sp|Q3ZCM7|TBB8_HUMAN;sp|Q9BUF5|TBB6_HUMAN	303;303;303;303;303;303;303;303;303	1	46.8912	0.0353752	46.891
sp|P07947|YES_HUMAN	255	1	42.0587	0.00484778	42.059
sp|P15880|RS2_HUMAN	229	1	66.4345	7.86575e-12	115.71		91899.9
sp|P20645|MPRD_HUMAN	32	1	51.3458	0.0258713	51.346				31229.1
sp|Q6NUT3|MFS12_HUMAN	86	0.993215	21.6547	9.11601e-05	87.639	500756	266804	88607.1	44686.3
sp|P08754|GNAI3_HUMAN	139	1	52.7897	2.39047e-36	134.68	252894	316013	97022.9	114889
sp|P08865|RSSA_HUMAN	148	1	46.6604	0.00148781	46.66
sp|P01112|RASH_HUMAN	118	1	48.2287	5.56881e-11	80.603	114864	107791		34607.1
sp|P13639|EF2_HUMAN	388	1	64.3937	0.000502609	64.394
sp|P13639|EF2_HUMAN	591	1	67.3584	0.000164956	67.358
sp|P00558|PGK1_HUMAN	50	1	47.2013	2.04096e-07	91.207	94082.9	71724	23358.4
sp|P14618|KPYM_HUMAN	474	1	43.4968	0.00486545	43.497
sp|P14618|KPYM_HUMAN	49	1	51.2649	0.000128105	74.12	25046.2
sp|P20645|MPRD_HUMAN	244	0.903305	9.70429	0.000523565	46.307						36431.7
sp|P15880|RS2_HUMAN	182	1	40.5195	0.025004	40.52
sp|P30825|CTR1_HUMAN	3	1	40.0661	0.0020031	59.227	17184.8	48023.6
sp|O14828|SCAM3_HUMAN	142	1	76.1636	1.3414e-12	76.164	74867.3					176304
sp|Q9C0B5|ZDHC5_HUMAN	236	0.88996	9.07818	0.00105249	58.671		145882		122191
sp|P21333|FLNA_HUMAN	483	0.905883	9.83404	0.00602153	46.926
sp|P21333|FLNA_HUMAN	2601	1	53.1664	0.00988895	62.546	49195.4
sp|P04075|ALDOA_HUMAN	339	1	55.5494	3.88923e-07	107.79	67922.2	69554	41214.5
sp|P48509|CD151_HUMAN	11	0.999998	58.0876	2.28629e-05	90.308	242992	52909.7
sp|P27635|RL10_HUMAN;sp|Q96L21|RL10L_HUMAN	195;195	1	55.6761	0.0166819	55.676
sp|P27635|RL10_HUMAN;sp|Q96L21|RL10L_HUMAN	105;105	1	67.1532	0.0271995	67.153
sp|P30041|PRDX6_HUMAN	47	1	42.1905	0.000293739	74.769	32823	66784.9
sp|P30041|PRDX6_HUMAN	91	1	53.001	9.29196e-06	88.087	153549
sp|P30101|PDIA3_HUMAN	85	0.999882	39.2759	0.0199318	41.401
sp|P30101|PDIA3_HUMAN	92	0.999935	41.8374	0.0167287	43.084
sp|P30519|HMOX2_HUMAN	265	1	66.2667	4.53271e-05	100.93	276363	96360.9
sp|P30519|HMOX2_HUMAN	282	1	76.1427	2.38687e-12	117.89	105844	72860.6
sp|P04899|GNAI2_HUMAN	66	1	83.047	4.86788e-07	102.66	53818.1	78625.4		33633.9
sp|P00338|LDHA_HUMAN	293	1	47.018	0.000446944	62.966	69831.7
sp|P32970|CD70_HUMAN	133	1	82.2594	1.83046e-10	82.259
sp|Q04941|PLP2_HUMAN	12	0.999611	34.1006	2.6652e-07	80.387	810118	178030	187775			92115.3
sp|P32970|CD70_HUMAN	8	1	61.3533	0	215.72	3.4901e+07	2.32147e+07	2.37931e+06	4.57951e+06	309025	413079
sp|Q8TCZ2|C99L2_HUMAN	214	1	54.0044	4.7062e-10	80.545		98934.7
sp|P50443|S26A2_HUMAN	78	1	71.6442	1.89006e-17	116.73	208851	52710
sp|P40925|MDHC_HUMAN	154	1	66.5043	0.0058345	66.504
sp|P40925|MDHC_HUMAN	137	1	75.3835	7.09065e-08	75.383
sp|P41091|IF2G_HUMAN	105	1	47.0904	0.00169912	47.09
sp|P41091|IF2G_HUMAN;sp|Q2VIR3|IF2GL_HUMAN	434;434	1	44.0054	0.00766363	44.005
sp|P41440|S19A1_HUMAN	220	1	53.2519	0.00266946	53.252
sp|P41440|S19A1_HUMAN	246	1	106.291	4.29284e-133	172.49	1.05486e+06	810578	178741	140183	14634
sp|P45880|VDAC2_HUMAN	47	1	40.0117	0.000762648	56.719	57137.1
sp|P45880|VDAC2_HUMAN	210	1	64.4223	0.000640378	64.422	70991.7
sp|P48509|CD151_HUMAN	15	0.999523	33.2152	0.00898688	49.418
sp|Q5W111|SPRY7_HUMAN	54	0.999424	32.3931	1.62095e-12	83.54	61300.6
sp|P84103|SRSF3_HUMAN	6	0.999998	57.8982	0.000921942	73.931	72353.3		34015.4
sp|P36578|RL4_HUMAN	96	1	53.4477	0.00098241	77.677	56065
sp|P13639|EF2_HUMAN	567	1	88.3377	1.28853e-19	123.84	44176.9	41793.4
sp|P50443|S26A2_HUMAN	80	1	74.3899	2.34905e-32	128.61	218972	548366	305676		40805.4
sp|P55072|TERA_HUMAN	105	1	54.5244	0.00147916	54.524
sp|P55072|TERA_HUMAN	522	1	81.2963	0.000149823	81.296
sp|P55072|TERA_HUMAN	209	1	87.8504	1.10384e-23	90.714	27954
sp|P60033|CD81_HUMAN	175	1	46.1561	0.00442454	46.156
sp|Q13444|ADA15_HUMAN	726	1	76.5334	0.000215374	76.533	77831
sp|P62280|RS11_HUMAN	131	1	40.8555	0.00395396	40.856
sp|Q96F81|DISP1_HUMAN	1140	0.999946	42.6957	0.00220272	55.841		49234.1
sp|P62937|PPIA_HUMAN	52	1	40.4964	0.0188623	41.399
sp|Q14789|GOGB1_HUMAN	3230	1	66.9887	0.00208623	66.989	75450.6
sp|P36578|RL4_HUMAN	208	1	65.4716	7.82003e-05	65.472	36933.3
sp|P63092|GNAS2_HUMAN	3	1	117.934	2.5511e-124	162.07	312494	945467	202102	316241
sp|P63092|GNAS2_HUMAN;sp|P38405|GNAL_HUMAN;sp|Q5JWF2|GNAS1_HUMAN	365;352;1008	0.999945	42.598	1.08871e-05	67.136
sp|P08754|GNAI3_HUMAN	66	1	42.7886	0.00062778	59.898		35636.3
sp|P04899|GNAI2_HUMAN;sp|P08754|GNAI3_HUMAN;sp|P63096|GNAI1_HUMAN	326;325;325	1	53.001	4.69813e-06	85.457
sp|P04899|GNAI2_HUMAN;sp|P63096|GNAI1_HUMAN	352;351	1	42.0009	0.0430288	42.001
sp|P63096|GNAI1_HUMAN	66	1	41.8708	0.00933797	41.871
sp|P63096|GNAI1_HUMAN	139	1	73.8478	2.98376e-62	148.52	246306	340002	41392	119434
sp|P68363|TBA1B_HUMAN;sp|P68366|TBA4A_HUMAN	295;295	1	41.208	0.00277207	41.208
sp|P68363|TBA1B_HUMAN;sp|P68366|TBA4A_HUMAN	347;347	1	40.5769	0.000513126	62.14
sp|P84103|SRSF3_HUMAN	10	0.999909	40.3935	0.0148685	44.692
sp|Q9H6R6|ZDHC6_HUMAN	329	0.920591	10.642	0.00162311	55.656	60199.1	47108.7
sp|O14828|SCAM3_HUMAN	147	1	76.1636	1.3414e-12	76.164						79000.5
sp|Q8TCZ2|C99L2_HUMAN	236	1	41.8708	3.07452e-05	69.729	28202.4	44813.4
sp|Q07020|RL18_HUMAN	101	1	52.0261	0.0110064	52.026
sp|Q16658|FSCN1_HUMAN	80	1	66.7969	0.000227804	68.034	19713.7
sp|P08754|GNAI3_HUMAN	351	1	43.8078	0.0362842	43.808		31130.9
sp|P63092|GNAS2_HUMAN;sp|P38405|GNAL_HUMAN;sp|Q5JWF2|GNAS1_HUMAN	379;366;1022	1	96.1713	9.52307e-06	96.171	142673
sp|Q14160|SCRIB_HUMAN	104	1	46.9641	0.00707179	46.964
sp|Q8TB61|S35B2_HUMAN	73	1	56.5102	1.16048e-08	101.52		33954.5
sp|Q14344|GNA13_HUMAN	37	1	60.2551	1.53605e-12	110.39	220556	259410	40324.1	97051.6
sp|Q14344|GNA13_HUMAN	14	0.999995	53.0496	2.97559e-42	128.41	564320	328138
sp|Q14789|GOGB1_HUMAN	3213	0.999949	42.9036	0.00429315	42.904
sp|O14936|CSKP_HUMAN	698	1	45.3301	0	225.23	1.88648e+06	657989	50286.9	54210.7
sp|Q15005|SPCS2_HUMAN	26	0.999993	51.3454	2.93496e-06	73.21
sp|Q96F81|DISP1_HUMAN	1151	1	46.6209	3.55165e-17	89.982		18803.3
sp|Q16658|FSCN1_HUMAN	89	1	45.368	0.0445021	45.368
sp|Q15005|SPCS2_HUMAN	17	1	67.6045	2.57713e-06	73.672	64197.8	30860.5
sp|O75955|FLOT1_HUMAN	17	1	79.1876	5.23175e-23	113.69	97472.6	94489			17706.3	41535.7
sp|Q587I9|SFT2C_HUMAN	67	1	42.7886	0	314.34	9.85916e+06	6.16195e+06	1.92052e+06	2.21407e+06	217827	196290
sp|Q5W111|SPRY7_HUMAN	49	0.977044	16.2902	0.0010177	47.752
sp|O94854|K0754_HUMAN	31	1	82.9077	1.90342e-11	82.908	86952.6
sp|P30825|CTR1_HUMAN	628	1	46.8912	0.000329027	75.483	38326.2
sp|Q6N075|MFSD5_HUMAN	33	1	66.2987	0.001395	66.299
sp|P62937|PPIA_HUMAN	161	1	67.385	2.73578e-05	100.48	77804.3	240718	60126.8			24378.1
sp|P21333|FLNA_HUMAN	2543	1	51.3476	4.27835e-07	73.448		26358.9
sp|P08865|RSSA_HUMAN	163	1	52.7253	3.9987e-18	121.96	111236	144846		23299.1
sp|Q8IZN3|ZDH14_HUMAN	51	1	47.067	0.0180923	47.067
sp|P49207|RL34_HUMAN	83	1	51.3458	0.0177989	53.968	70599.3
sp|Q8NCG7|DGLB_HUMAN	611	0.89759	9.42735	0.00326831	54.234
sp|Q8NCG7|DGLB_HUMAN	86	1	67.9808	0.00428259	67.981	30796.2
sp|Q8NCG7|DGLB_HUMAN	304	1	66.073	1.50452e-138	168.23	177415	186306	69214.2	118661		95978.2
sp|Q8TB61|S35B2_HUMAN	80	1	50.878	0.023924	50.878
sp|Q13444|ADA15_HUMAN	733	1	40.3516	0.00465639	59.245	37252.6	18565.4
sp|O60716|CTND1_HUMAN	516	1	49.4481	0.000479318	72.006	42924.3
sp|P07947|YES_HUMAN	42	1	59.8385	1.09289e-15	72.218	517222	577315
sp|Q14160|SCRIB_HUMAN	22	1	61.1103	0.000565796	61.11		99619.3
sp|P62280|RS11_HUMAN	60	1	44.4149	1.25042e-15	83.453		109156
sp|Q99497|PARK7_HUMAN	46	1	41.5543	0.0125741	41.554
sp|Q99497|PARK7_HUMAN	53	1	45.8637	0.00408637	45.864
sp|Q9C0K1|S39A8_HUMAN	291	0.998512	28.2661	1.44289e-05	87.18	224822	178581	53195.1
sp|Q07020|RL18_HUMAN	134	1	74.579	5.41375e-16	86.557	62530.8	38059.5
sp|Q9C0B5|ZDHC5_HUMAN	245	1	48.188	5.70953e-206	187.34	1.44716e+06	1.84668e+06	614891	1.35255e+06	418036	477841
sp|Q6N075|MFSD5_HUMAN	236	1	62.9784	1.2344e-21	114.59	327662	397366	97017.8	286965
sp|Q9C0K1|S39A8_HUMAN	289	0.999231	31.1379	4.29637e-05	100.19	190249	103168	23150.9
sp|Q9H6R6|ZDHC6_HUMAN	295	1	50.1551	0.00290582	50.155
sp|P21333|FLNA_HUMAN	1997	1	73.985	0.000553106	73.985		15995.5
sp|Q9H6R6|ZDHC6_HUMAN	328	0.932497	11.4032	2.70235e-07	95.573	87775.6	106228
sp|Q9H6R6|ZDHC6_HUMAN	343	1	89.2472	5.96347e-176	180.11	1.64242e+06	3.14285e+06	419394	416681	153788	77884.3
sp|Q9Y6M5|ZNT1_HUMAN	433	0.999771	36.3979	0.00274446	69.602	27631.5	22577.2
sp|Q9Y6M5|ZNT1_HUMAN	469	1	82.5037	8.28798e-142	167.51	278723	140079
